# Supplementary material for: Twist1 Inactivation in Dmp1-Expressing Cells Increases Bone Mass but Does Not Affect the Anabolic Response to Sclerostin Neutralization
Source: MDPI journal article supplement (doi:10.3390/ijms20184427), 2019-09-09
Supplement: s1 [file s1]

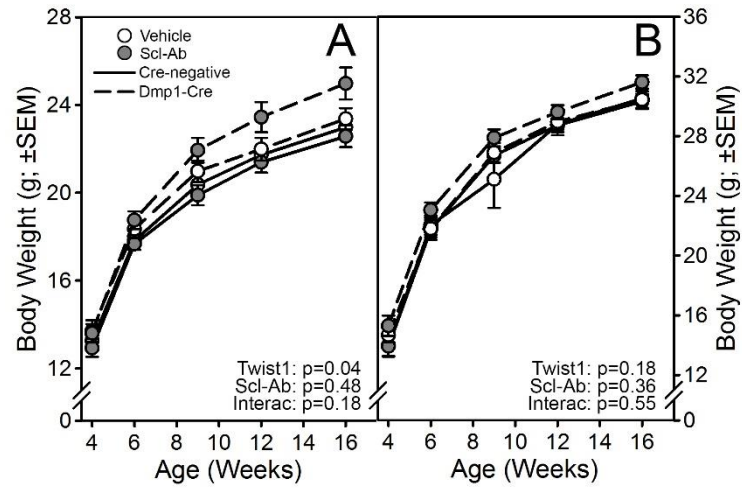

**Figure S1.** Body mass in Cre-negative (solid lines) and 10kbDmp1-Cre positive (broken lines) Twist1f/f mice, treated twice per week with vehicle control (open circles) or 25 mg/kg sclerostin antibody (Scl-Ab; filled circles). Body mass was measured every 2–4 wks in both (A) female and (B) male mice. The longitudinal weight data were tested for significance of both main effects and an interaction using rmANOVA, reported in the corner of both panels.  $N = 8\text{--}11/\text{group}$ .
